# Supplementary material
Source: publisher site journal article supplement (https://www.spandidos-publications.com/6690/downloadSupplementary)
Supplement: Supplementary file 1 [file downloadSupplementary]

## Sheet: Table S5
Table SV. Genes associated with peripheral blood stemness identified by weighted gene co-expression network analysis.
Genes
AEN
BCL7A
BLNK
CCT3
CD22
CD37
CD52
CYB561A3
DDX50
EIF2B1
EIF3K
FCER2
FCMR
GALNT18
HVCN1
LIMD2
LINC01235
LTB
MMUT
PAX5
PTPRCAP
RPS4X
SELENOH
SMAD3
SPIB
TCL1A
TINF2
